# Supplementary material
Source: PubMed Central journal article supplement (PMC3943520)
Supplement: supp_ddt574_ddt574supp.pdf [file supp_ddt574_ddt574supp.pdf]

**Supplementary data for**  
**“No evidence for shared genetic basis of common variants in**  
**multiple sclerosis and amyotrophic lateral sclerosis”**

An Goris, Jessica van Setten, Frank Diekstra, Stephan Ripke, Nikolaos A. Patsopoulos,  
Stephen J. Sawcer, The International Multiple Sclerosis Genetics Consortium, Michael van  
Es, The Australia and New Zealand MS Genetics Consortium, Peter M. Andersen, Judith  
Melki, Vincent Meininger, Orla Hardiman, John E. Landers, Robert Brown Jr., Aleksey  
Shatunov, Nigel Leigh, Ammar Al-Chalabi, Christopher E. Shaw, Bryan J. Traynor, Adriano  
Chiò, Gabriella Restagno, Gabriele Mora, Roel A. Ophoff, Jorge R. Oksenberg, Philip Van  
Damme, Alastair Compston, Wim Robberecht, Bénédicte Dubois, Leonard H. van den Berg,  
Philip L. De Jager, Jan H. Veldink, Paul I.W. de Bakker

**Supplementary Table 1. Polygenic risk model excluding the HLA region**

**A. Polygenic score based on MS data in ALS**

| <b>Model</b> | <b>P-value</b> | <b># SNPs</b> | <b>Nagelkerke <math>r^2</math> corrected for baseline<sup>a</sup></b> |
|--------------|----------------|---------------|-----------------------------------------------------------------------|
| <5E-8        | 0.341          | 4             | 9.4E-05                                                               |
| <5E-7        | 0.446          | 8             | 6.0E-05                                                               |
| <5E-6        | 0.481          | 23            | 5.2E-05                                                               |
| <5E-5        | 0.512          | 87            | 4.5E-05                                                               |
| <5E-4        | 0.727          | 518           | 1.3E-05                                                               |
| <5E-3        | 0.405          | 3314          | 7.2E-05                                                               |
| <0.05        | 0.623          | 22116         | 2.5E-05                                                               |
| <0.1         | 0.732          | 29682         | 1.2E-05                                                               |
| <0.2         | 0.928          | 66084         | 9.0E-07                                                               |
| <0.3         | 0.652          | 88914         | 2.1E-05                                                               |
| <0.4         | 0.380          | 108424        | 8.0E-05                                                               |
| <0.5         | 0.338          | 125353        | 9.5E-05                                                               |

<sup>a</sup>Baseline: PC1-3, dummy coded cohorts

**A. Polygenic score based on ALS data in MS**

| <b>Model</b> | <b>P-value</b> | <b># SNPs</b> | <b>Nagelkerke <math>r^2</math> corrected for baseline<sup>b</sup></b> |
|--------------|----------------|---------------|-----------------------------------------------------------------------|
| <5E-8        | 0.843          | 3             | 4.5E-06                                                               |
| <5E-7        | 0.785          | 4             | 8.4E-06                                                               |
| <5E-6        | 0.500          | 7             | 5.2E-05                                                               |
| <5E-5        | 0.452          | 49            | 6.4E-05                                                               |
| <5E-4        | 0.882          | 388           | 2.5E-06                                                               |
| <5E-3        | 0.597          | 3066          | 3.2E-05                                                               |
| <0.05        | 0.029          | 22274         | 5.4E-04                                                               |
| <0.1         | 0.050          | 38850         | 4.4E-04                                                               |
| <0.2         | 0.038          | 66630         | 4.9E-04                                                               |
| <0.3         | 0.052          | 89464         | 4.3E-04                                                               |
| <0.4         | 0.041          | 108697        | 4.7E-04                                                               |
| <0.5         | 0.061          | 125179        | 4.0E-04                                                               |

<sup>b</sup>Baseline: PC1-5, dummy coded cohorts

## **International Multiple Sclerosis Genetic Consortium (IMSGC) membership**

Lisa Barcellos<sup>1</sup>, David Booth<sup>2</sup>, Jacob L McCauley<sup>3</sup>, Manuel Comabella<sup>4</sup>, Alastair Compston<sup>5</sup>, Sandra D'Alfonso<sup>6</sup>, Philip De Jager<sup>7</sup>, Bertrand Fontaine<sup>8</sup>, An Goris<sup>9</sup>, David Hafler<sup>10</sup>, Jonathan Haines<sup>11</sup>, Hanne F. Harbo<sup>12</sup>, Stephen L. Hauser<sup>13</sup>, Clive Hawkins<sup>14</sup>, Bernhard Hemmer<sup>15</sup>, Jan Hillert<sup>16</sup>, Adrian Ivinson<sup>17</sup>, Ingrid Kockum<sup>18</sup>, Roland Martin<sup>19</sup>, Filippo Martinelli Boneschi<sup>20</sup>, Jorge Oksenberg<sup>13</sup>, Tomas Olsson<sup>18</sup>, Annette Oturai<sup>21</sup>, Nikolaos Patsopoulos<sup>7</sup>, Margaret Pericak-Vance<sup>22</sup>, Janna Saarela<sup>23</sup>, Stephen Sawcer<sup>5</sup>, Anne Spurkland<sup>24</sup>, Graeme Stewart<sup>2</sup>, Frauke Zipp<sup>25</sup>

<sup>1</sup> Genetic Epidemiology and Genomics Laboratory, Division of Epidemiology, School of Public Health, University of California, Berkeley, California, USA

<sup>2</sup> Westmead Millennium Institute, University of Sydney, New South Wales 2145, Australia.

<sup>3</sup> John P. Hussman Institute for Human Genomics and The Dr. John T Macdonald Foundation Department of Human Genetics, University of Miami, Miller School of Medicine, Miami, Florida, USA

<sup>4</sup> Clinical Neuroimmunology Unit, Multiple Sclerosis Center of Catalonia (CEM-Cat), Vall d'Hebron University Hospital, Barcelona, Spain

<sup>5</sup> Department of Clinical Neurosciences, University of Cambridge, Addenbrooke's Hospital, Cambridge, CB2 0QQ, UK

<sup>6</sup> Department of Medical Sciences and Interdisciplinary Research Center of Autoimmune Diseases (IRCAD), University of Eastern Piedmont, Novara, Italy

<sup>7</sup> Department of Neurology, Brigham & Women's Hospital and Harvard Medical School, Boston, MS, USA

<sup>8</sup> INSERM UMR S 975 CRICM, UPMC, Departement de neurologie Pitie-Salpetriere, AP-HP, Paris, France

<sup>9</sup> Laboratory for Neuroimmunology, Section for Experimental Neurology, Katholieke Universiteit Leuven, Leuven, Belgium

<sup>10</sup> Departments of Neurology and Immunobiology, Yale School of Medicine, New Haven, CT, USA

<sup>11</sup> Center for Human Genetics Research, Vanderbilt University Medical Center, 519 Light Hall, Nashville, Tennessee 37232, USA

<sup>12</sup> Department of Neurology, Oslo University Hospital, Ullevål and University of Oslo, Oslo Norway

<sup>13</sup> Department of Neurology, University of California San Francisco, San Francisco, USA

<sup>14</sup> Keele University Medical School, Stoke-on-Trent ST4 7NY, UK

<sup>15</sup> Klinik für Neurologie, Klinikum rechts der Isar, Technische Universität, München, Germany

<sup>16</sup> Department of Clinical Neurosciences, Centre for Molecular Medicine. Karolinska Institutet, Karolinska University Hospital, Stockholm, Sweden

<sup>17</sup> Harvard NeuroDiscovery Center, Harvard Medical School, Boston, Massachusetts, USA.

<sup>18</sup> Neuroimmunology Unit, Center for Molecular Medicine, Department of Clinical Neuroscience, Karolinska Institutet, Stockholm, Sweden

<sup>19</sup> Institute for Neuroimmunology and Clinical MS Research (inims), Centre for Molecular Neurobiology, Falkenried 94, D-20251 Hamburg, Germany

<sup>20</sup> Department of Neurology, Institute of Experimental Neurology (INSPE), Division of Neuroscience, San Raffaele Scientific Institute, Milan, Italy

<sup>21</sup> Danish Multiple Sclerosis Center, University of Copenhagen and Department of Neurology, Rigshospitalet, Copenhagen, Denmark

<sup>22</sup> John P. Hussman Institute for Human Genomics and The Dr. John T Macdonald Foundation  
Department of Human Genetics, University of Miami, Miller School of Medicine, Miami,  
Florida, USA

<sup>23</sup> Institute for Molecular Medicine Finland FIMM, University of Helsinki, Helsinki, Finland

<sup>24</sup> Institute of Basal Medical Sciences, University of Oslo, Norway

<sup>25</sup> Department of Neurology, University Medicine Mainz, Johannes Gutenberg University  
Mainz, Mainz, Germany

### **The Australia and New Zealand MS Genetics Consortium (ANZGene) membership**

Rodney J Scott<sup>1</sup>, Jeannette Lechner-Scott<sup>1</sup>, Pablo Moscato<sup>1</sup>, David R. Booth<sup>2</sup>, Graeme J. Stewart<sup>2</sup>, Robert N. Heard<sup>2</sup>, Deborah Mason<sup>3</sup>, Lyn Griffiths<sup>4</sup>, Simon Broadley<sup>5</sup>, Matthew A. Brown<sup>6</sup>, Mark Slee<sup>7</sup>, Simon J. Foote<sup>8,9</sup>, Jim Stankovich<sup>8,10</sup>, Bruce V. Taylor<sup>8</sup>, James Wiley<sup>11</sup>, Melanie Bahlo<sup>12</sup>, Victoria Perreau<sup>11</sup>, Judith Field<sup>11</sup>, Helmut Butzkueven<sup>10</sup>, Trevor J. Kilpatrick<sup>10</sup>, Justin Rubio<sup>11,13</sup>, Mark Marriott<sup>10</sup>, William M. Carroll<sup>14</sup>, Allan G. Kermode<sup>14</sup>.

<sup>1</sup> Hunter Medical Research Institute, Newcastle, NSW, Australia

<sup>2</sup> Westmead Millennium Institute, Sydney, NSW, Australia

<sup>3</sup> Canterbury District Health Board, Christchurch, New Zealand

<sup>4</sup> Griffith Institute of Health and Medical Research, Griffith University, Gold Coast,  
Queensland, Australia

<sup>5</sup> School of Medicine, Griffith University, Gold Coast, Queensland, Australia

<sup>6</sup> Diamantia Institute of Cancer, Immunology and Metabolic Medicine, Brisbane, Queensland,  
Australia

<sup>7</sup> Flinders University, South Australia, Australia

<sup>8</sup> Menzies Research Institute, Tasmania, Australia

<sup>9</sup> Macquarie University, NSW, Australia

<sup>10</sup> University of Melbourne, Victoria, Australia

<sup>11</sup> Florey Neuroscience Institutes, Victoria, Australia

<sup>12</sup> Walter & Eliza Hall Institute, Victoria, Australia

<sup>13</sup> GlaxoSmithKline, Stevenage, UK

<sup>14</sup> Sir Charles Gairdner Hospital, Perth, Western Australia, Australia
